# Supplementary material for: Design of SnO2 Aggregate/Nanosheet Composite Structures Based on Function-Matching Strategy for Enhanced Dye-Sensitized Solar Cell Performance
Source: MDPI journal article supplement (doi:10.3390/ma11091774), 2018-09-19
Supplement: s1 [file s1]

## Supplementary Materials

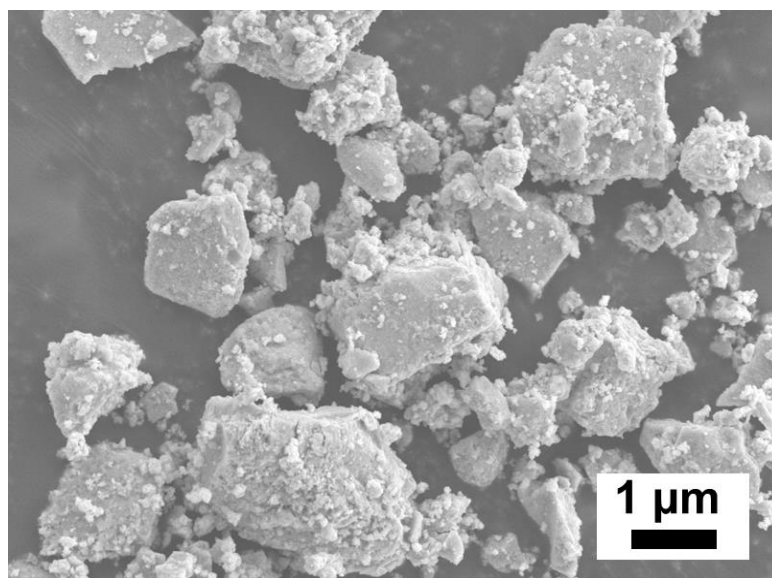

**Figure S1.** SEM images of SnO<sub>2</sub> aggregates.
